# Supplementary material for: Single-Atom Iron Catalyst Based on Functionalized Mesophase Pitch Exhibiting Efficient Oxygen Reduction Reaction Activity
Source: MDPI journal article supplement (doi:10.3390/catal12121608), 2022-12-08
Supplement: s1 [file s1]

# Single-Atom Iron Catalyst Based on Functionalized Mesophase Pitch Exhibiting Efficient Oxygen Reduction Reaction Activity

Xianrui Gu<sup>1</sup>, Meng Wang<sup>2</sup>, Hongpeng Peng<sup>2</sup>, Qian Peng<sup>1</sup>, Wei Wang<sup>1</sup>, Houpeng Wang<sup>1</sup>, Junjun Shi<sup>1</sup>, Xuetao Qin<sup>2</sup>, Zhijian Da<sup>1\*</sup>, Wenhong Yang<sup>3</sup>, Yuchao Wu<sup>3\*</sup>, Ding Ma<sup>2</sup>, and Houliang Dai<sup>1</sup>

<sup>1</sup>Research Institute of Petroleum Processing, Sinopec, No. 18, Xueyuan Road, Haidian District, Beijing 100083, China

<sup>2</sup>Beijing National Laboratory for Molecular Sciences, College of Chemistry and Molecular Engineering and College of Engineering and BIC-ESAT Peking University, Beijing, 100871, China

<sup>3</sup>Petrochemical Research Institute, CNPC, Block E., A42, Shahe Town, CHinaping District, Beijing 100871, China

\*e-mail: wuyuchao@petrochina.com.cn (Y.Wu); dazhijian.ripp@sinopec.com (Z.Da)

## Supporting Information

**Table S1:** Elemental compositions of SA-Fe@NC catalysts determined by XPS.

| Entry                     | C [at%] | O [at%] | Fe [at%] | Total N [at%] |
|---------------------------|---------|---------|----------|---------------|
| SA-Fe@NC <sub>800</sub>   | 90.22   | 5.98    | 0.43     | 3.71          |
| SA-Fe@NC <sub>950</sub>   | 92.44   | 5.24    | 0.26     | 2.05          |
| SA-Fe@NC <sub>1100</sub>  | 93.65   | 4.62    | 0.14     | 1.59          |
| SA-Fe@NC <sub>800-1</sub> | 90.42   | 6.45    | 0.34     | 2.79          |
| SA-Fe@NC <sub>800-2</sub> | 88.31   | 9.86    | 0.19     | 1.63          |

**Table S2:** N contents of SA-Fe@NC catalysts pyrolyzed at different temperatures obtained from XPS N 1s spectra.

| Entry                    | Total N [at%] | Pyridinic [at%] | Pyrrolic [at%] | Quaternary [at%] | Graphitic [at%] | Fe-N <sub>x</sub> [at%] |
|--------------------------|---------------|-----------------|----------------|------------------|-----------------|-------------------------|
| SA-Fe@NC <sub>800</sub>  | 3.71          | 0.83            | 1.96           | 0.29             | 0.24            | 0.39                    |
| SA-Fe@NC <sub>950</sub>  | 2.05          | 0.32            | 1.41           | 0.13             | 0.10            | 0.10                    |
| SA-Fe@NC <sub>1100</sub> | 1.59          | 0.17            | 1.06           | 0.19             | 0.07            | 0.06                    |

**Table S3:** Structural parameters extracted from the Fe K-edge EXAFS fitting.

| Entry                          | Shell   | Bond length<br>(Å) | Coordination<br>Number | $\sigma^2$<br>(Å <sup>2</sup> ) | E <sub>0</sub> shift<br>(eV) | R-factor<br>( $\times 10^{-3}$ ) |
|--------------------------------|---------|--------------------|------------------------|---------------------------------|------------------------------|----------------------------------|
| SA-Fe@NC <sub>800</sub>        | Fe-N(O) | 2.17               | 5.1                    | 0.008                           | 1.4                          | 9.8                              |
| Fe Foil                        | Fe-Fe   | 2.43               | 12                     | 0.003                           | 3.2                          | 8.7                              |
| Fe <sub>2</sub> O <sub>3</sub> | Fe-O    | 2.04               | 6.0                    | 0.009                           | 0.1                          | 0.9                              |
| -                              | Fe-Fe   | 2.97               | 5.9                    | 0.007                           | 0.1                          | 0.9                              |
| -                              | Fe-Fe   | 3.39               | 4.3                    | 0.007                           | 0.1                          | 0.9                              |
| -                              | Fe-Fe   | 3.71               | 5.6                    | 0.007                           | 0.1                          | 0.9                              |

$\sigma^2$  is the Debye-Waller factor; R factor is used to value the goodness of the fitting.

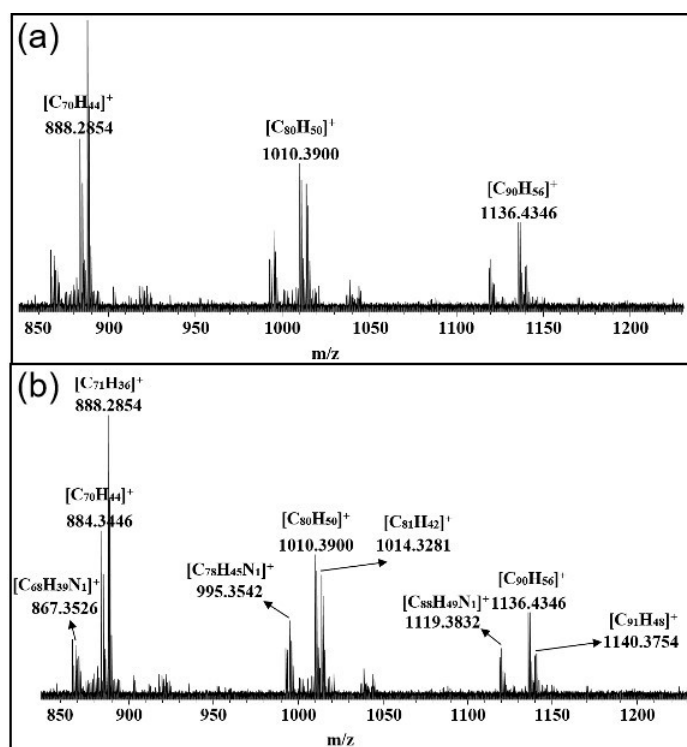

**Figure S1:** FT-ICR-MS results under the atmospheric pressure photo ionization (APPI) mode, (a) peaks show the presence of the naphthalene polymers and (b) peaks show the presence of the dehydrogenized co-polymers of indole-naphthalene.

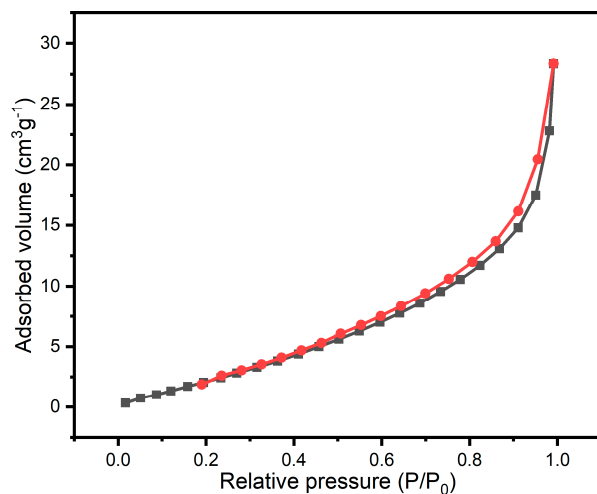

**Figure S2:** BET results for the control sample using  $\text{AlCl}_3$  as polymerization catalyst.

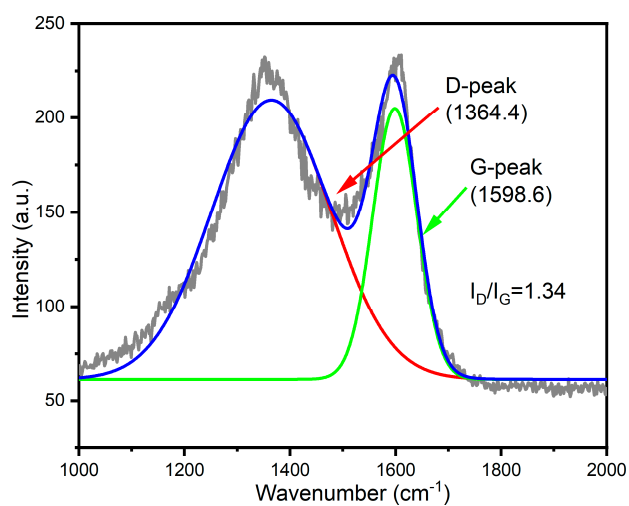

**Figure S3:** Raman of SA-Fe@NC<sub>950</sub>.

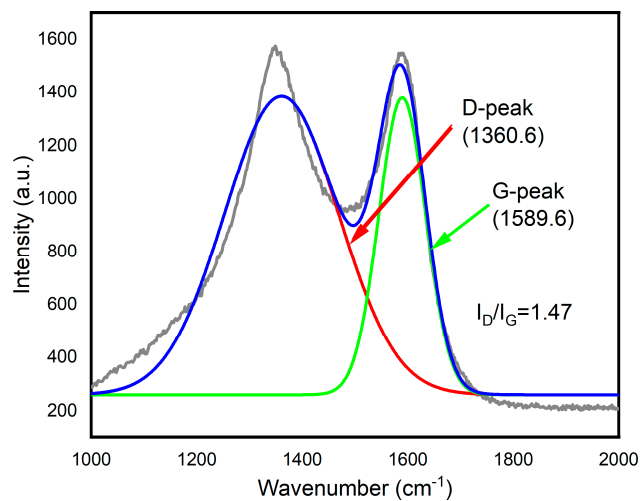

**Figure S4:** Raman of SA-Fe@NC<sub>1100</sub>.

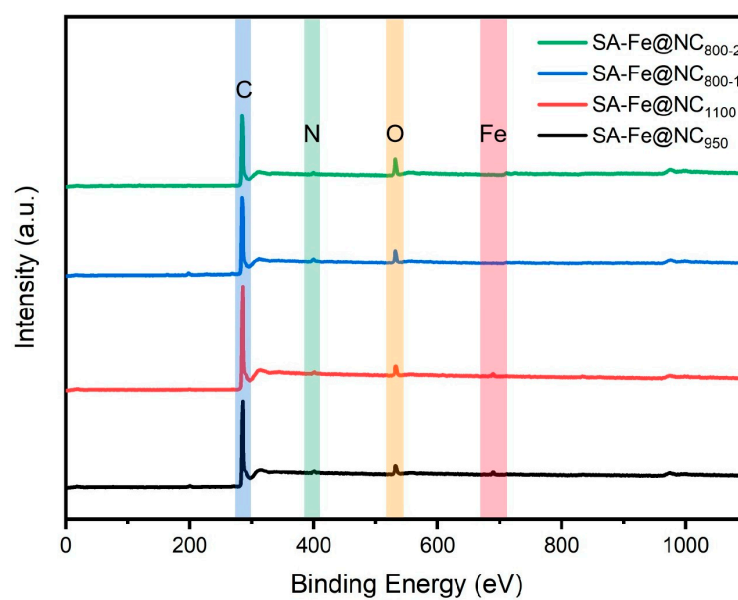

**Figure S5:** XPS survey scan spectra of SA-Fe@NC<sub>950</sub>, SA-Fe@NC<sub>1100</sub>, SA-Fe@NC<sub>800-1</sub> and SA-Fe@NC<sub>800-2</sub>

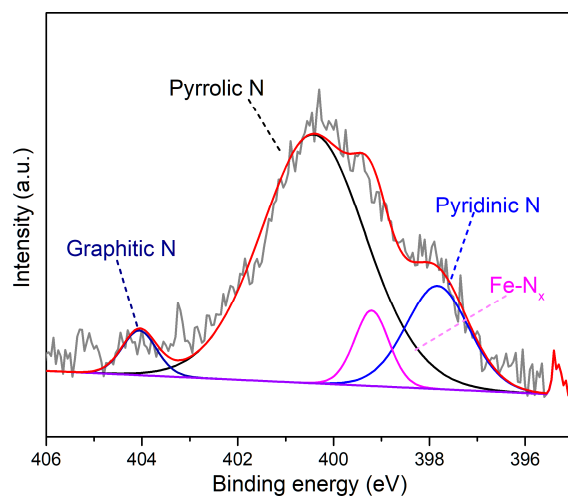

**Figure S6:** XPS of SA-Fe@NC<sub>950</sub>.

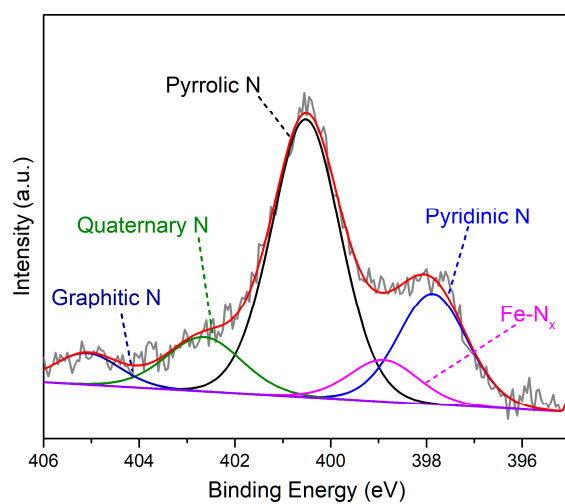

**Figure S7:** XPS of SA-Fe@NC<sub>1100</sub>.

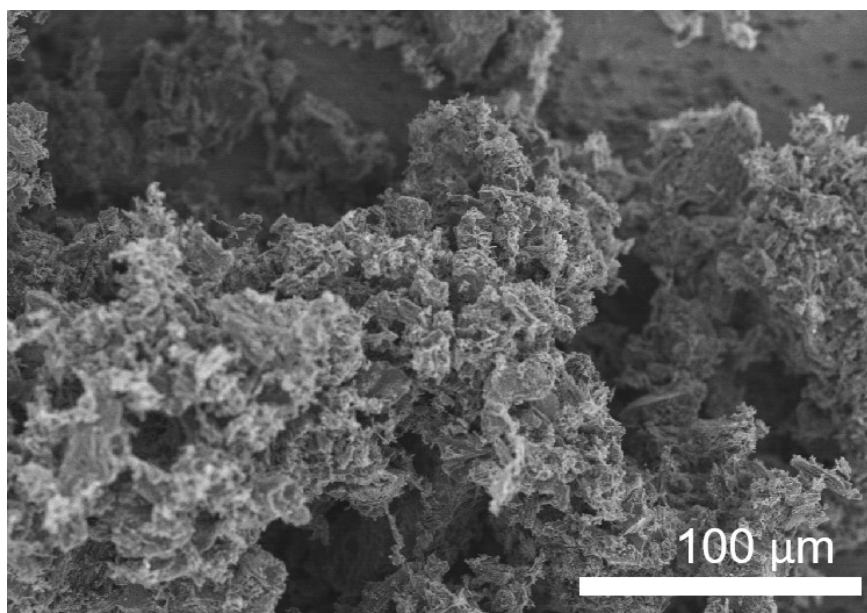

**Figure S8:** SEM of SA-Fe@NC<sub>800</sub> showing structures with hierarchical pores.

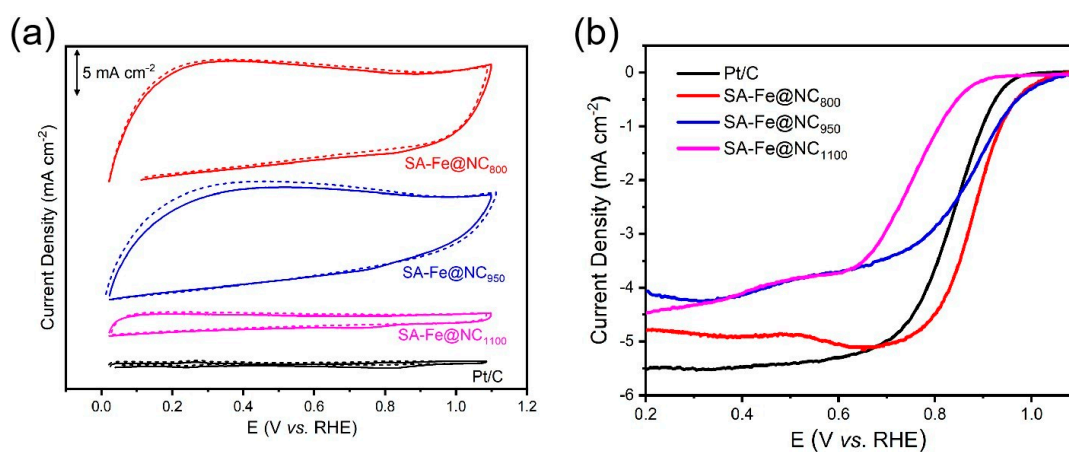

**Figure S9:** (a) CV curves of SA-Fe@NC<sub>800</sub>, SA-Fe@NC<sub>950</sub>, SA-Fe@NC<sub>1100</sub> and Pt/C catalysts in O<sub>2</sub>-saturated (solid line) and N<sub>2</sub>-saturated (dashed line) in 0.1 M KOH solutions at a sweep rate of 50 mV s<sup>-1</sup>. (b) LSV curves of above catalysts in O<sub>2</sub>-saturated 0.1 M KOH electrolyte at 10 mV s<sup>-1</sup> with a rotation rate of 1600 rpm.

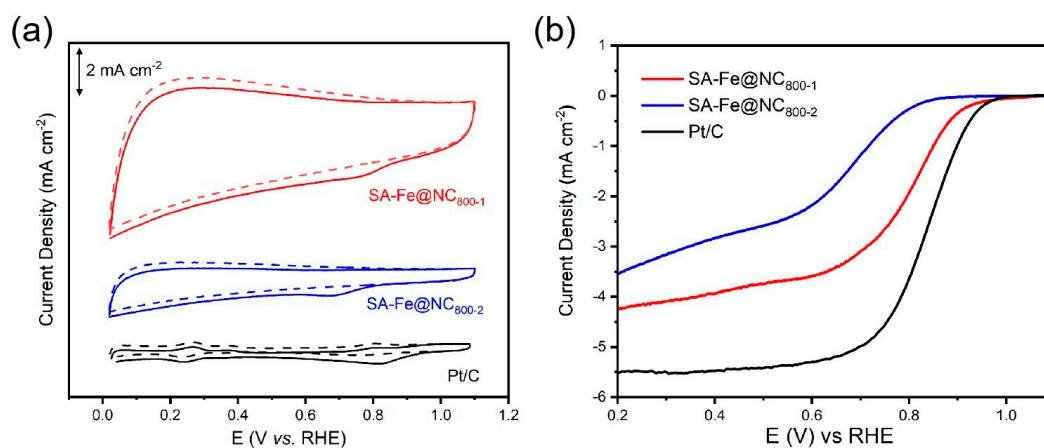

**Figure S10:** (a) CV curves of SA-Fe@NC<sub>800-1</sub>, SA-Fe@NC<sub>800-2</sub> and Pt/C catalysts in O<sub>2</sub>-saturated (solid line) and N<sub>2</sub>-saturated (dashed line) in 0.1 M KOH solutions at a sweep rate of 50 mV s<sup>-1</sup>. (b) LSV curves of above catalysts in O<sub>2</sub>-saturated 0.1 M KOH electrolyte at 10 mV s<sup>-1</sup> with a rotation rate of 1600 rpm.

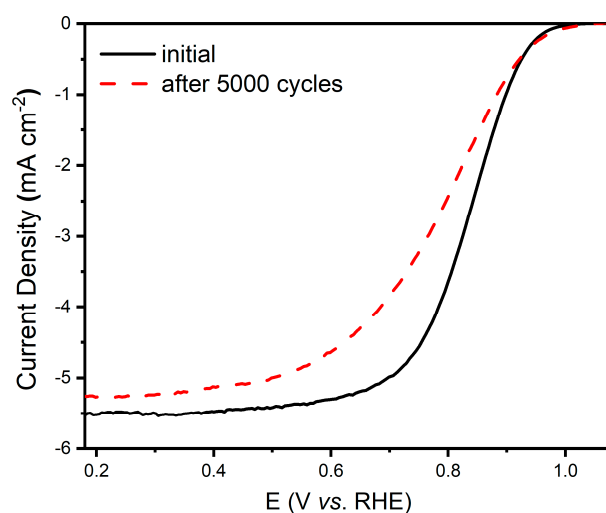

**Figure S11:** LSV curves for Pt/C before and after 5000 CV cycles between 0.6 and 1.0 V.

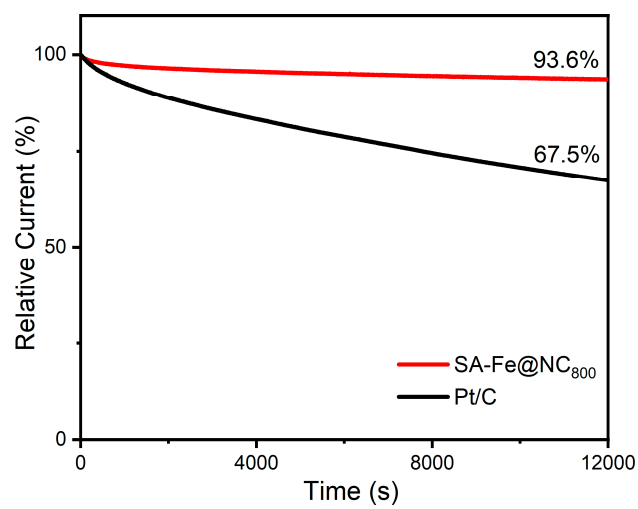

**Figure S12:** Stability test of the SA-Fe@NC<sub>800</sub> and the commercial Pt/C in the O<sub>2</sub>-saturated 0.1M KOH solution at 0.8 V under a rotation rate of 1600 rpm.
